# Supplementary material
Source: PubMed Central journal article supplement (PMC3189045)
Supplement: 1110221108_pnas.1110221108_SI.pdf [file 1110221108_pnas.1110221108_SI.pdf]

# Supporting Information

Guy et al. 10.1073/pnas.1110221108

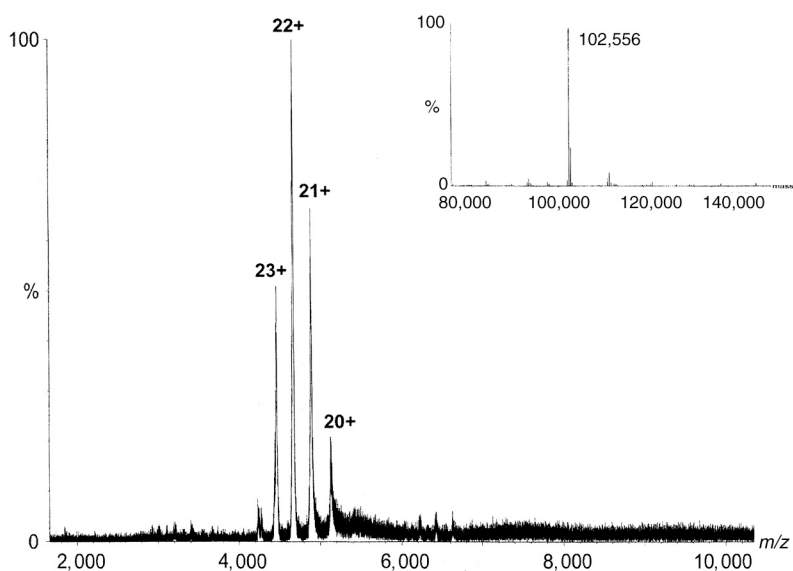

**Fig. S1.** Electrospray ionization mass spectrum of the sample used for crystallization. The calculated mass of the protein is displayed in the inset. Experimental conditions were as follows: source temperature 120 °C, desolvation gas 120 °C at a flow of 300 L/h, cone voltage 80 V with the electrospray capillary voltage held constant at 3,000 V. The collision cell was pressurized by argon (approximately 15 psi valve setting) and the pumping of the electrospray source region throttled to give an “analyzer” gauge reading of  $5.5 \times 10^{-5}$  mbar and a TOF gauge reading of  $4.2 \times 10^{-7}$  mbar. Horse heart myoglobin (Sigma) was used as an external calibrant. Data were analyzed with the MassLynx 3.5 software package including the Maxent deconvolution algorithm.

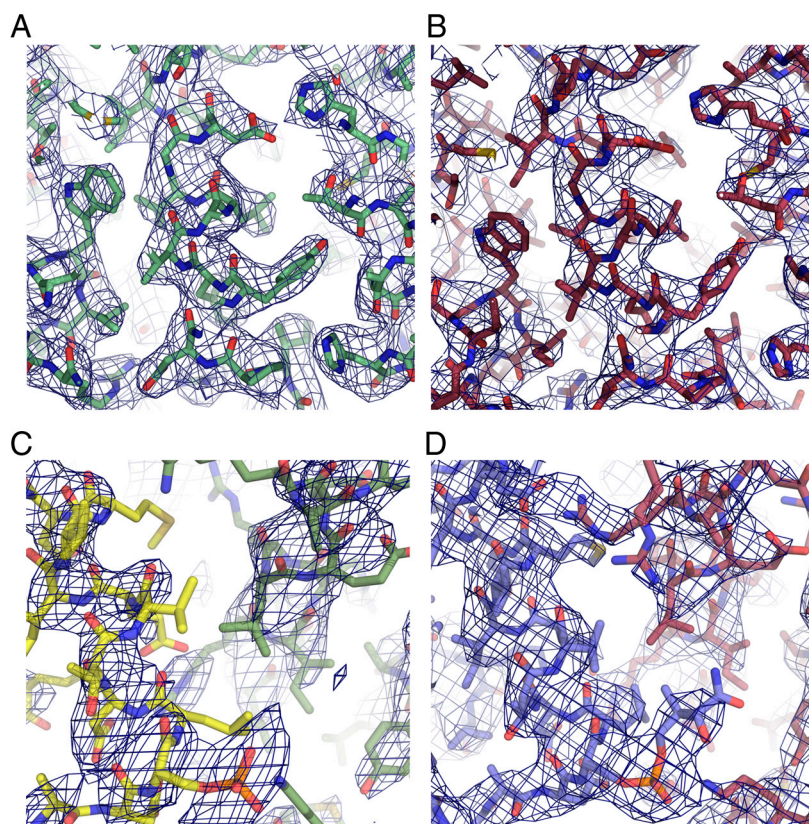

**Fig. S2.** Electron density ( $2F_o - F_c$ ) maps contoured at  $1\sigma$ , showing the desaturase itself in (A) crystal form 1 and (B) crystal form 2, and the desaturase-acyl carrier protein interface in (C) crystal form 1 and (D) crystal form 2.



**Table S1. Regiochemistry of desaturation products of the castor and ivy desaturases with 14:0, 16:0, and 18:0 substrates**

|        | 14:1       |            | 16:1       |            | 18:1       |            |
|--------|------------|------------|------------|------------|------------|------------|
|        | $\Delta 4$ | $\Delta 9$ | $\Delta 4$ | $\Delta 9$ | $\Delta 4$ | $\Delta 9$ |
| Castor | 17 (0.6)*  | 83 (0.6)   | ND         | 100        | ND         | 100        |
| Ivy    | 100        | ND         | 100        | ND         | 3 (0.5)    | 97 (0.5)   |

\*Numbers represent percent of product with SD in parenthesis; ND, not detectable with a detection limit of <0.5%.

**Table S2. Protein-protein interaction modeling with Haddock**

| Protein 1         | Protein 2 | Input surface residues 1     | Input surface residues 2 | Resulting models | Cluster size | Score | Buried surface area | Complex conformation |
|-------------------|-----------|------------------------------|--------------------------|------------------|--------------|-------|---------------------|----------------------|
| Castor desaturase | ACP       | 260, 262, 280, 333, 340, 344 | 38                       | cluster1_3       | 53           | -86   | 1,161               | $\Delta 9$           |
|                   |           |                              |                          | cluster2_3       | 141          | -79   | 1,365               | unproductive         |
|                   |           |                              |                          | cluster3_3       | 4            | -41   | 1,134               | almost $\Delta 9$    |
| Ivy desaturase    | ACP       | 255, 257, 275, 328, 335, 339 | 38                       | cluster1_5       | 135          | -97   | 1,465               | $\Delta 4$           |
|                   |           |                              |                          | cluster2_5       | 15           | -62   | 1,255               | unproductive         |
|                   |           |                              |                          | cluster3_5       | 23           | -53   | 1,040               | unproductive         |
|                   |           |                              |                          | cluster4_5       | 6            | -46   | 1,141               | almost $\Delta 9$    |
|                   |           |                              |                          | cluster5_5       | 12           | -33   | 899                 | tilted $\Delta 9$    |

ACP, acyl carrier protein.

**Table S3. Castor desaturase basic residues in the acyl carrier protein (ACP)-desaturase interface and corresponding residues in ivy desaturase**

| Desaturase species | Specificity     | Residues in the observed ACP-desaturase interface |        |      |      |      |      |      |      |  |
|--------------------|-----------------|---------------------------------------------------|--------|------|------|------|------|------|------|--|
|                    |                 | R260                                              | (D280) | R333 | R336 | L337 | R340 | R344 | K346 |  |
| Castor desaturase  | 18:0 $\Delta 9$ | R260                                              | (D280) | R333 | R336 | L337 | R340 | R344 | K346 |  |
| Ivy desaturase     | 16:0 $\Delta 4$ | R255                                              | (K275) | K328 | R331 | V332 | K335 | K339 | K341 |  |

Residues in parenthesis are only part of the modeled  $\Delta 4$ -complex.

**Table S4. Crystallographic data collection and refinement statistics for the two forms of acyl carrier protein (ACP)-desaturase complex crystals**

|                                                | Crystal form 1     | Crystal form 2      |
|------------------------------------------------|--------------------|---------------------|
| Space group                                    | $P3_121$           | $P4_322$            |
| Unit cell, Å                                   | 188.3, 188.3, 81.3 | 76.4, 76.4, 403.4   |
| Molecules in asymmetric unit (desaturase)      | 3                  | 2                   |
| Molecules in asymmetric unit (ACP)             | 1                  | 2                   |
| Resolution, Å                                  | 30-3.0 (3.16-3.0)  | 20-3.35 (3.44-3.35) |
| $R_{\text{sym}}$                               | 0.08 (0.48)        | 0.073 (0.6)         |
| $\langle I \rangle / \langle \sigma I \rangle$ | 21.9 (4.3)         | 9.7 (2.0)           |
| Completeness, %                                | 99.9 (100.0)       | 94.6 (96.0)         |
| Multiplicity                                   | 11.1 (9.6)         | 2.6 (2.7)           |
| B factor from Wilson plot                      | 87.9               | 117                 |
| <i>Refinement statistics</i>                   |                    |                     |
| Reflections in working set                     | 32,013             | 16,101              |
| Reflections in test set                        | 1,363              | 857                 |
| $R_{\text{factor}}/R_{\text{free}}$            | 24.2/27.7          | 21.2/25.4           |
| No. of protein atoms                           | 9,045              | 6,910               |
| No. of metal ions                              | 9                  | 6                   |
| No. of water molecules                         | 26                 | 0                   |
| Avg B factor                                   | 98.1               | 107.3               |
| <i>rmsd from ideals</i>                        |                    |                     |
| Bond lengths, Å                                | 0.013              | 0.009               |
| Bond angles, °                                 | 1.30               | 1.10                |
| <i>Ramachandran plot</i>                       |                    |                     |
| Preferred regions                              | 96.3%              | 95.7%               |
| Outliers                                       | 0.27%              | 0.35%               |

Data in parentheses are for the highest resolution shell.
